# Supplementary material for: Metabolic Remodeling during Long-Lasting Cultivation of the Endomyces magnusii Yeast on Oxidative and Fermentative Substrates
Source: PubMed Central journal article supplement (PMC7022524; doi:10.3390/microorganisms8010091), 2020-01-09
Supplement: microorganisms-08-00091-s001.pdf [file microorganisms-08-00091-s001.pdf]

Growth curves of the *E. magnusii* yeast on glycerol- and glucose- containing media.

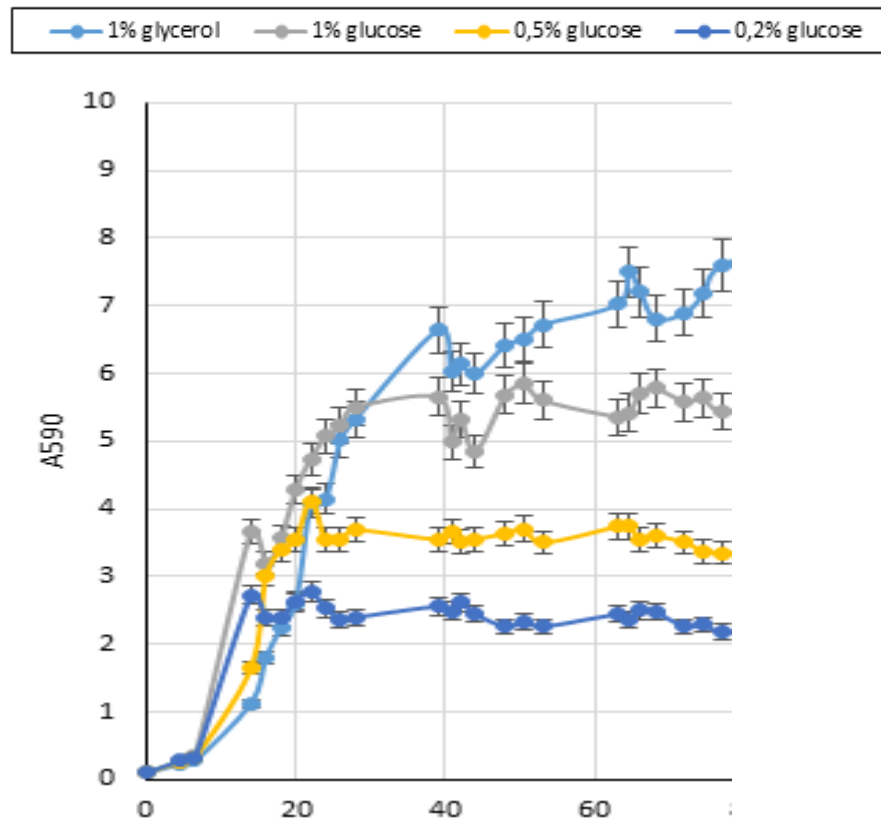

**FIGURE S1** Growth curves of the *E. magnusii* yeast on glycerol- and glucose- containing media.

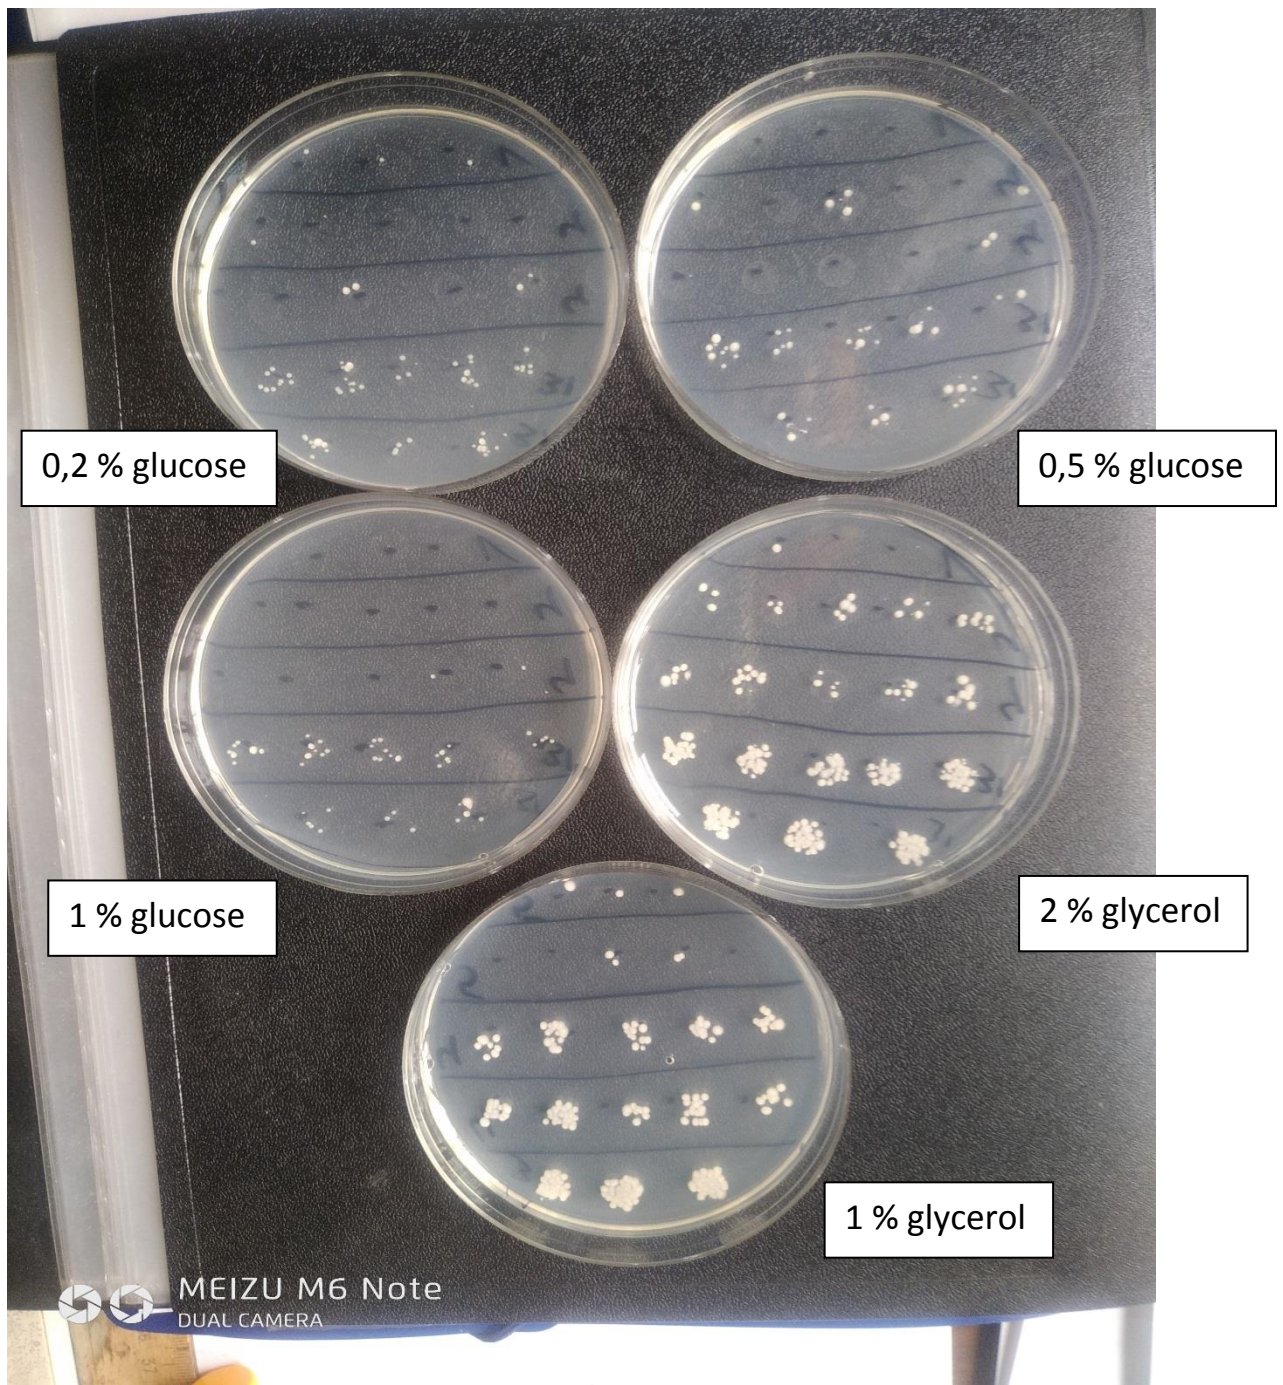

**FIGURE S2. The survival of the yeast grown in glycerol- and glucose-containing media in 4 weeks.**
